# Supplementary material for: Pantomime of tool use: looking beyond apraxia
Source: PubMed Central journal article supplement (PMC8936430; doi:10.1093/braincomms/fcab263), 2021-10-30
Supplement: fcab263_Supplementary_Data.pdf [file fcab263_Supplementary_Data.pdf]

**Pantomime of tool use: Looking beyond apraxia**

François Osiurak<sup>1,2</sup>, Emanuelle Reynaud<sup>1</sup>, Josselin Baumard<sup>3</sup>,  
Yves Rossetti<sup>4,5</sup>, Angela Bartolo<sup>2,6</sup>, & Mathieu Lesourd<sup>7,8</sup>

<sup>1</sup>Laboratoire d'Etude des Mécanismes Cognitifs (EA3082), Université de Lyon, France

<sup>2</sup>Institut Universitaire de France, Paris, France

<sup>3</sup>Normandie Univ., UNIROUEN, CRFDP (EA7475), Rouen, France

<sup>4</sup>Centre de Recherche en Neurosciences de Lyon, Trajectoires Team, CNRS U5292, Inserm U1028, Université de Lyon, France

<sup>5</sup>Mouvement, Handicap, et Neuro-Immersion, Hospices Civils de Lyon et Centre de Recherche en Neurosciences de Lyon, Hôpital Henry Gabrielle, St Genis Laval, France

<sup>6</sup>Univ. Lille, CNRS, UMR9193, SCALab – Sciences Cognitives et Sciences Affectives, Lille, France

<sup>7</sup>Laboratoire de Recherches Intégratives en Neurosciences et Psychologie Cognitive (UR481), Université de Bourgogne Franche-Comté, Besançon, France

<sup>8</sup>MSHE Ledoux, CNRS, Université de Bourgogne Franche-Comté, Besançon, France

**Correspondence**

François Osiurak, Laboratoire d'Etude des Mécanismes Cognitifs (EA 3082), Institut de Psychologie, 5, avenue Pierre Mendès-France, 69676 Bron Cedex, France.

Email: Francois.Osiurak@univ-lyon2.fr

## Supplementary Methods

### Brain lesion studies

For the selection of brain lesions studies, we used the terms ‘apraxia’ AND ‘brain lesions’ to identify studies of interest for each of our analyses (i.e., real tool use, pantomime of tool use, and imitation of meaningless gestures). We used the search engine “PubMed”. This search returned 773 results at the date of 22/12/2020. We restricted our selection for each analysis to studies that met a series of selection criteria:

1. Only patients presenting exclusively left brain-damaged patients were considered.
2. Single case studies were not included.
3. Only studies using lesion mapping method were included (e.g., lesion-subtraction analysis or voxel-based lesion symptom mapping).
4. Reports had to provide lesion peaks data or at least overlay lesion plots associated with selective disturbances.

When coordinates lesions were available, we depicted the location of the reported lesion sites on flat-map representations of a left hemisphere (PALS-B12; Population-Average, Surface and Landmark-based human cortical atlas<sup>1</sup>). If only lesion plots were reported in the study, we made several transformations before depicting the lesion sites on the flatmap representation, by following a three-step method. This three-step method is completely described in Lesourd et al.<sup>2</sup> (see also<sup>3</sup>). Finally, we used the parcellation of Glasser et al.<sup>4</sup> to identify the brain areas of interest and considered a brain area as a brain area of interest when a brain area was reported in all the “modalities” (e.g., modality for pantomime of tool use or type of posture for imitation of meaningless postures) or in at least 50% of the conditions included for a given “modality” (e.g., visual modality for pantomime of tool use).

### Neuroimaging studies

For the selection of neuroimaging studies, we used the terms ‘pantomime’ AND ‘neuroimaging’ to identify studies of interest for our analysis on pantomime of tool use, and ‘imitation’ AND ‘neuroimaging’ to identify studies of interest for our analysis on imitation of meaningless gestures. We used the search engine “PubMed”. This search

returned 90 results at the date of 22/12/2020 for 'pantomime' AND 'neuroimaging' and 557 results at the date of 22/12/2020 for 'imitation' AND 'neuroimaging'. We also conducted an additional search with the terms 'gesture' AND 'neuroimaging', which returned 448 results at the date of 22/12/2020. We restricted our selection for each analysis to studies that met a series of selection criteria:

1. Reviews were excluded.
2. Studies had to use functional magnetic resonance imaging (fMRI) or positron emission tomography (PET) as imaging modality.
3. Only neurologically healthy adults were included.
4. Neuroimaging results had to be based on whole-brain scanning. Regions of interest analyses were therefore excluded from our selection.
5. The complete list of activation peaks (i.e., foci) of main effects with their coordinates had to be reported in a stereotactic space.

The meta-analysis of neuroimaging studies was conducted using the revised version<sup>5,6</sup> of the Activation Likelihood Estimation<sup>7</sup> (ALE) method, as implemented by the GingerALE 2.3 software (<http://www.brainmap.org/ale/>). The methods employed here is the same as the one described by Reynaud et al.<sup>8</sup> (see also<sup>2,9,10</sup>). Finally, the resulting thresholded ALE maps were visualized on flatmap representations of a standardized brain atlas (PALS-B12) using Caret, version 5.65<sup>1</sup> (<http://brainmap.wustl.edu/caret.html>).

### **Studies of patients with selective semantic deficits**

For the selection of studies of patients with selective semantic deficits, we did not use the search engine "PubMed" because of the difficulty to use the appropriate terms. Indeed, in such studies, the assessment of apraxia can be very "peripheral" and difficult to be identified by a search engine. Instead, we conducted a bibliographical search from the key papers on the topic<sup>11-13</sup>. We reported only the papers in which the data on semantic knowledge tasks and pantomime/single tool use were available for each patient. Note that we did not find any paper in which a correlation coefficient was mentioned between semantic knowledge tasks and pantomime/single tool use without the individual data for each patient. Said differently, the data reported in the present review correspond to all the data we have obtained on this topic.

## References

1. Van Essen DC, Drury HA, Dickson J, Harwell J, Hanlon D, Anderson CH. An integrated software suite for surface-based analyses of cerebral cortex. *J Am Med Informatics Assoc.* 2001;8(5):443-459.
2. Lesourd M, Osiurak F, Baumard J, Bartolo A, Vanbellinghen T, Reynaud E. Cerebral correlates of imitation of intransitive gestures: An integrative review of neuroimaging data and brain lesion studies. *Neurosci Biobehav Rev.* 2018;95:44-60.
3. Niessen E, Fink GR, Weiss PH. Apraxia, pantomime and the parietal cortex. *NeuroImage Clin.* 2014;5:42-52.
4. Glasser MF, Coalson TS, Robinson EC, et al. A multi-modal parcellation of human cerebral cortex. *Nature.* 2016;536(7615):171-178.
5. Eickhoff SB, Laird AR, Grefkes C, Wang LE, Zilles K, Fox PT. Coordinate-based activation likelihood estimation meta-analysis of neuroimaging data: A random-effects approach based on empirical estimates of spatial uncertainty. *Hum Brain Mapp.* 2009;30(9):2907-2926.
6. Eickhoff SB, Bzdok D, Laird AR, Kurth F, Fox PT. Activation likelihood estimation meta-analysis revisited. *Neuroimage.* 2012;59(3):2349-2361.
7. Turkeltaub PE, Eden GF, Jones KM, Zeffiro TA. Meta-analysis of the functional neuroanatomy of single-word reading: method and validation. *Neuroimage.* 2002;16(3):765-780.
8. Reynaud E, Lesourd M, Navarro J, Osiurak F. On the neurocognitive origins of human tool use: A critical review of neuroimaging data. *Neurosci Biobehav Rev.* 2016;64:421-437.
9. Faye A, Jacquin-Courtois S, Reynaud E, Lesourd M, Besnard J, Osiurak F. Numerical cognition: A meta-analysis of neuroimaging, transcranial magnetic stimulation and brain-damaged patients studies. *NeuroImage Clin.* 2019;24.
10. Reynaud E, Navarro J, Lesourd M, Osiurak F. To watch is to work: A review of neuroimaging data on tool use observation network. *Neuropsychol Rev.* 2019;29(4):484-497.
11. Hodges JR, Spatt J, Patterson K. "What" and "how": Evidence for the dissociation of object knowledge and mechanical problem-solving skills in the human brain. *Proc Natl Acad Sci U S A.* 1999;96(16):9444-9448.
12. Hodges JR, Bozeat S, Lambon Ralph MA, Patterson K, Spatt J. The role of conceptual knowledge in object use: Evidence from semantic dementia. *Brain.* 2000;123(9):1913-1925.
13. Bozeat S, Lambon Ralph MA, Patterson K, Hodges JR. When objects lose their meaning: What happens to their use? *Cogn Affect Behav Neurosci.* 2002;2(3):236-251.

## Supplementary Information

All the references mentioned in the tables are cited in the main text.

**Supplementary Table 1. Summary of the brain lesion studies included in "Real tool use"**

| Study                        | N   | Task                  | Coordinates  | Table/figure                 |
|------------------------------|-----|-----------------------|--------------|------------------------------|
| Goldenberg & Spatt (2009)    | 38  | Familiar tool use     | Lesion plots | Fig. 1                       |
| Goldenberg & Spatt (2009)    | 38  | Mech. problem solving | Lesion plots | Fig. 1                       |
| Randerath et al. (2010)      | 42  | Familiar tool use     | Available    | Table 1 (Erroneous tool use) |
| Mengotti et al. (2013)       | 57  | Familiar tool use     | Available    | Table 5 (Ideational apraxia) |
| Martin, Beume, et al. (2016) | 136 | Familiar tool use     | Lesion plots | Fig. 3A                      |
| Salazar-Lopez et al. (2016)  | 31  | Familiar tool use     | Lesion plots | Fig. 5A                      |

N, Number of left brain-damaged patients included in the study. Mech. problem solving, Mechanical problem solving.

**Supplementary Table 2. Summary of the brain lesion studies included in "Pantomime of tool use"**

| Study                           | N   | Modality            | Coordinates  | Table/figure                      |
|---------------------------------|-----|---------------------|--------------|-----------------------------------|
| Hermisdörfer et al. (2013)      | 23  | Visual              | Lesion plots | Fig. 6 (Panto)                    |
| Kalénine et al. (2013)          | 23  | Visual              | Lesion plots | Fig. 6A                           |
| Buxbaum et al. (2014)           | 71  | Visual              | Available    | Table 2 (GestTool)                |
| Hoeren et al. (2014)            | 96  | Visual              | Lesion plots | Fig. 4A                           |
| Tarhan et al. (2015)            | 131 | Visual              | Available    | Table 2 (AP)                      |
| Watson & Buxbaum (2015)         | 31  | Visual              | Lesion plots | Fig. 5A*                          |
| Martin, Nitschke, et al. (2016) | 36  | Visual              | Lesion plots | Fig. 8C (PantoTool)               |
| Weiss et al. (2016)             | 50  | Visual              | Lesion plots | Fig. 4A                           |
| Dressing et al. (2019)          | 48  | Visual              | Lesion plots | Fig. S2C (Pantomime)              |
| Tessari et al. (2007)           | 22  | Imitation           | Lesion plots | Fig. 4B                           |
| Mengotti et al. (2013)          | 57  | Imitation           | Available    | Table 5 (Meaningful) <sup>o</sup> |
| Buxbaum et al. (2014)           | 71  | Imitation           | Available    | Table 2 (ImTool)                  |
| Martin, Nitschke, et al. (2016) | 36  | Imitation           | Lesion plots | Fig. 8C (ImiTool)                 |
| Dressing et al. (2018)          | 156 | Imitation           | Lesion plots | Fig. S1A                          |
| Dressing et al. (2019)          | 48  | Imitation           | Lesion plots | Fig. S2C (Imitation)              |
| Goldenberg et al. (2007)        | 44  | Verbal <sup>#</sup> | Lesion plots | Fig. 1B                           |
| Manuel et al. (2013)            | 150 | Verbal              | Lesion plots | Fig. 1B                           |
| Goldenberg & Randerath (2015)   | 96  | Verbal <sup>#</sup> | Lesion plots | Fig. 2 (Pantomime)                |
| Finkel et al. (2018)            | 67  | Verbal <sup>#</sup> | Lesion plots | Fig. 2A                           |

N, Number of left brain-damaged patients included in the study. \*, This study reports a significant cluster of 81981 voxels in the internal capsule (white matter) in Table 3 (MNI coordinates:  $x = -24, y = -24, z = 12$ ). Given the size of the cluster, it appeared inappropriate to report only one coordinate. This explains why we used the three-step method based on the lesion plots depicted in the Figure 5 of this study. \*\*, The score reported here corresponds to a composite score "pantomime + symbolic gestures". #, In these three studies, a picture of the object is shown along with the verbal command. We considered that the verbal modality is privileged over the visual modality and assigned these three studies to the "verbal" category.

## Pantomime of tool use and apraxia

**Supplementary Table 3. Summary of the neuroimaging studies included in "Pantomime of tool use"**

| <b>Study</b>                 | <b>N</b> | <b>Method</b> | <b>Modality</b> | <b>Table</b>                           |
|------------------------------|----------|---------------|-----------------|----------------------------------------|
| Choi et al. (2001)           | 10       | fMRI          | Verbal          | Table 2 (Right hand)                   |
| Ohgami et al. (2004)         | 18       | fMRI          | Verbal          | Table 1 (Mime with right hand)         |
| Johnson-Frey et al. (2005)   | 13       | fMRI          | Verbal          | Table 1                                |
| Fridman et al. (2006)        | 19       | fMRI          | Verbal          | Table 1a                               |
| Montgomery et al. (2007)     | 14       | fMRI          | Verbal          | Table 1 (Value for do)                 |
| Bohlhalter et al. (2009)     | 15       | fMRI          | Verbal          | Table 1 (Transitive/Right)             |
| Króliczak & Frey (2009)      | 12       | fMRI          | Verbal          | Table SA                               |
| Emmorey et al. (2011)        | 14       | PET           | Verbal          | Table 2 (Pantomime)                    |
| Mäki-Marttunen et al. (2014) | 20       | fMRI          | Verbal          | Table 1a                               |
| Mäki-Marttunen et al. (2014) | 20       | fMRI          | Verbal          | Table 1b                               |
| Hermsdörfer et al. (2007)    | 23       | fMRI          | Visual          | Table 1 (Event 2)                      |
| Higuchi et al. (2007)        | 8        | fMRI          | Visual          | Table 2 (Imagery)                      |
| Imazu et al. (2007)          | 12       | fMRI          | Visual          | Table 2 (Pantomime/Tool)               |
| Imazu et al. (2007)          | 12       | fMRI          | Visual          | Table 2 (Imagining/Tool)               |
| Vingerhoets et al. (2009)    | 15       | fMRI          | Visual          | Table 2 (Use ... >move neutral shapes) |
| Peran et al. (2010)          | 12       | fMRI          | Visual          | Table 2 (MSoA>GenA)                    |
| Vingerhoets et al. (2011)    | 16       | fMRI          | Visual          | Table 1 (Planning/Familiar tools)      |
| Wadsworth et al. (2011)      | 32       | fMRI          | Visual          | Table 2 (Imagined tool use...)         |
| Vingerhoets et al. (2013)    | 10       | fMRI          | Visual          | Table 3                                |
| Lausberg et al. (2015)       | 15       | fMRI          | Visual          | Table 1 (Conjunction P lh...)          |
| Vry et al. (2015)            | 24       | fMRI          | Visual          | Table 2 (Pantomime)                    |

**Supplementary Table 4. Summary of the brain lesion studies included in "Kinematics and Posture"**

| <b>Study</b>            | <b>N</b> | <b>Component</b>   | <b>Coordinates</b> | <b>Table/figure</b>         |
|-------------------------|----------|--------------------|--------------------|-----------------------------|
| Manuel et al. (2013)    | 150      | Kinematics         | Lesion plots       | Fig. S1C                    |
| Buxbaum et al. (2014)   | 71       | Kinematics         | Available          | Table 3 (ImTool kinematics) |
| Hoeren et al. (2014)    | 96       | Kinematics         | Lesion plots       | Fig. S1A*                   |
| Dressing et al. (2018)  | 156      | Kinematics         | Lesion plots       | Fig. 5A                     |
| Finkel et al. (2018)    | 67       | Kinematics         | Lesion plots       | Fig. 2C                     |
| Manuel et al. (2013)    | 150      | Posture (BPT)      | Lesion plots       | Fig. S1D                    |
| Finkel et al. (2018)    | 67       | Posture (BPT)      | Lesion plots       | Fig. 2D                     |
| Dressing et al. (2018)  | 156      | Posture (Grip)     | Lesion plots       | Fig. 5B                     |
| Finkel et al. (2018)    | 67       | Posture (Grip)     | Lesion plots       | Fig. 2B                     |
| Buxbaum et al. (2014)   | 71       | Posture (BPT/Grip) | Available          | Table 3 (GestTool posture)  |
| Buxbaum et al. (2014)   | 71       | Posture (BPT/Grip) | Available          | Table 3 (ImTool posture)    |
| Watson & Buxbaum (2015) | 31       | Posture (BPT Grip) | Available          | Table 3 (Conjunction)       |

N, Number of left brain-damaged patients included in the study. \*, non-recognizable errors.

## Pantomime of tool use and apraxia

**Supplementary Table 5. Summary of the brain lesion studies included in "Imitation of meaningless postures"**

| <b>Study</b>                  | <b><i>N</i></b> | <b>Posture</b>            | <b>Coordinates</b>  | <b>Table/figure</b>         |
|-------------------------------|-----------------|---------------------------|---------------------|-----------------------------|
| Mengotti et al. (2013)        | 57              | Hand/finger               | Available           | Table 6 (Meaningless)       |
| Hoeren et al. (2014)          | 96              | Hand/finger               | Lesion plots        | Fig. 2                      |
| Martin, Beume, et al. (2016)  | 136             | Hand/finger               | Lesion plots        | Fig. 8B                     |
| Weiss et al. (2016)           | 50              | Hand/finger               | Lesion plots        | Fig. 4C                     |
| Pizzamiglio et al. (2019)     | 387             | Hand/finger               | Available           | Table 4 (Gesture imitation) |
| Goldenberg & Karnath (2006)   | 44              | Hand                      | Lesion plots        | Fig. 3A                     |
| Buxbaum et al. (2014)         | 71              | Hand                      | Available           | Table 2 (ImNov)             |
| Goldenberg & Randerath (2015) | 96              | Hand                      | Lesion plots        | Fig. 2 (Hand)               |
| Achilles et al. (2019)        | 293             | Hand                      | Lesion plots        | Fig. S1                     |
| Tessari et al. (2021)         | 36              | Hand                      | Lesion plots        | Fig. 4C (Blue)              |
| Goldenberg & Karnath (2006)   | 44              | Finger                    | Lesion plots        | Fig. 3B                     |
| Goldenberg & Randerath (2015) | 96              | Finger                    | Lesion plots        | Fig. 2 (Finger)             |
| Achilles et al. (2019)        | 293             | Finger                    | Lesion plots        | Fig. 3A                     |
| Tessari et al. (2021)         | 36              | Finger                    | Lesion plots        | Fig. 4C (Red)               |
| <i>Dafsari et al. (2019)</i>  | 27              | <i>Body struct. desc.</i> | <i>Lesion plots</i> | <i>Fig. 4C</i>              |

*N*, Number of left brain-damaged patients included in the study. Body struct. desc., body structural description task.  
\*, non-recognizable errors.

**Supplementary Table 6. Summary of the neuroimaging studies included in "Imitation of meaningless postures"**

| <b>Study</b>              | <b>N</b> | <b>Method</b> | <b>Posture</b> | <b>Table</b>                             |
|---------------------------|----------|---------------|----------------|------------------------------------------|
| Tanaka & Inui (2002)      | 12       | fMRI          | Finger         | Table 1 (Finger)                         |
| Tanaka & Inui (2002)      | 12       | fMRI          | Hand           | Table 1 (Hand)                           |
| Koski et al. (2003)       | 8        | fMRI          | Finger         | Tables 1 & 2 (...vs. control motor task) |
| Koski et al. (2003)       | 8        | fMRI          | Finger         | Table 3                                  |
| Buccino et al. (2004)     | 12       | fMRI          | Finger         | Table 1                                  |
| Chaminade et al. (2005)   | 12       | fMRI          | Hand           | Table 4 (Imitating)                      |
| Mulhau et al. (2005)      | 12       | fMRI          | Hand/Finger    | Table 2                                  |
| Rumiati et al. (2005)     | 10       | PET           | Hand           | Table 3 (Main effect of ML movements)    |
| Jackson et al. (2005)     | 16       | fMRI          | Hand           | Table 1                                  |
| Suchan et al. (2008)      | 12       | PET           | Finger         | Table 2                                  |
| Adamovich et al. (2009)   | 13       | fMRI          | Finger         | Table 1                                  |
| Watanabe et al. (2011)    | 15       | fMRI          | Finger         | Table 2 (First person/anatomical)        |
| Watanabe et al. (2011)    | 15       | fMRI          | Finger         | Table 2 (First person/specular)          |
| Watanabe et al. (2011)    | 15       | fMRI          | Finger         | Table 2 (Third person/anatomical)        |
| Watanabe et al. (2011)    | 15       | fMRI          | Finger         | Table 2 (Third person/specular)          |
| Kruger et al. (2014)      | 20       | fMRI          | Hand           | Table 1                                  |
| Vingerhoets et al. (2015) | 17       | fMRI          | Finger         | Table 2 (ImNov>PanTool)                  |
| Watanabe et al. (2017)    | 17       | fMRI          | Finger         | Table 2                                  |
| Watanabe et al. (2017)    | 17       | fMRI          | Finger         | Table 3                                  |



## Pantomime of tool use and apraxia

**Supplementary Table 7. Summary of the studies of patients with selective semantic deficits**

| Study                       | N  | Task            | Description                                                                                                                                                                                                   |
|-----------------------------|----|-----------------|---------------------------------------------------------------------------------------------------------------------------------------------------------------------------------------------------------------|
| Coccia et al. (2004)        | 8* | Pantomime       | <i>Semantic knowledge:</i> Visual naming (Table 3).<br><i>Pantomime:</i> Visual pantomime and Pantomime-to-name (Table 3).                                                                                    |
| Nishio et al. (2006)        | 6  | Pantomime       | <i>Semantic knowledge:</i> Picture naming (Table 1).<br><i>Pantomime:</i> Action imitation test/Instrumental (Table 2).                                                                                       |
| Silveri & Ciccarelli (2009) | 5  | Pantomime       | <i>Semantic knowledge:</i> Object naming (Table 5).<br><i>Pantomime:</i> Pantomime execution (Table 5).                                                                                                       |
| Lesourd et al. (2017)       | 16 | Pantomime       | <i>Semantic knowledge:</i> Functional matching task (Personal data).<br><i>Pantomime:</i> Pantomime of tool use (Personal data).                                                                              |
| Hodges et al. (2000)        | 9  | Single tool use | <i>Semantic knowledge:</i> Visual associative knowledge (Fig.3; Composite score: Recipient, location, purpose).<br><i>Single tool use:</i> Object use (Fig. 4; Composite score: Hold, orientation, movement). |
| Bozeat et al. (2002)        | 8  | Single tool use | <i>Semantic knowledge:</i> Visual associative knowledge (Fig.2; Composite score: Recipient, function, action).<br><i>Single tool use:</i> Single object use (Fig. 7).                                         |
| Silveri & Ciccarelli (2009) | 5  | Single tool use | <i>Semantic knowledge:</i> Object naming (Table 5).<br><i>Single tool use:</i> Object use (Table 5).                                                                                                          |
| Nelissen et al. (2010)      | 9  | Single tool use | <i>Semantic knowledge:</i> Associative-semantic task (Table 1).<br><i>Single tool use:</i> Object use (Table 1).                                                                                              |
| Baumard et al. (2016)       | 16 | Single tool use | <i>Semantic knowledge:</i> Functional matching task (Personal data).<br><i>Single tool use:</i> Single tool use (Personal data).                                                                              |

\*, two patients who were assessed over a four-year longitudinal period.
